# Supplementary material
Source: PubMed Central journal article supplement (PMC4223919)
Supplement: rsif20140950supp4.pdf [file rsif20140950supp4.pdf]

**Table S3.** Keywords employed by our script to locate case data in original outbreak record text.

| <b>Case type</b>    | <b>Keywords</b>                                       | <b>Examples</b>                                                                              |
|---------------------|-------------------------------------------------------|----------------------------------------------------------------------------------------------|
| <b>Fatal</b>        | "fatal", "death"                                      | "4 fatalities", "15 deaths"                                                                  |
| <b>Hospitalized</b> | "hospital", "cases hospital"                          | "21 hospitalized", "2 cases hospitalized"                                                    |
| <b>Confirmed</b>    | "confirm", "clinical"                                 | "79 confirmed", "25 cases confirmed", "519 clinical cases"                                   |
| <b>Estimated</b>    | "case", "probable", "suspect", "probable", "estimate" | "83 cases", "215 suspect cases", "251 'probable' cases", "87 probable cases", "34 estimated" |
