# Supplementary material
Source: PubMed Central journal article supplement (PMC4223919)
Supplement: rsif20140950supp7.pdf [file rsif20140950supp7.pdf]

**Country**  
**Year**

**UNITED STATES**  
Notable outbreaks:  
1984 - An outbreak (42 cases, 29 hospitalized) was reported among American military personnel serving on an Air Force base in the Philippines.

**WALLIS AND FUTUNA ISLANDS**  
Notable outbreaks:  
2002 to 2003 (publication year) - An outbreak (2,938 cases suspected, 338 hospitalized, 172 confirmed, 2 fatal) was reported on Wallis (Halalo and Mata'utu) and Futuna.

**Cases**  
**Multinational Flag**  
**Publication Year Flag**  
**Cases**
