# Supplementary material
Source: PubMed Central journal article supplement (PMC4223919)

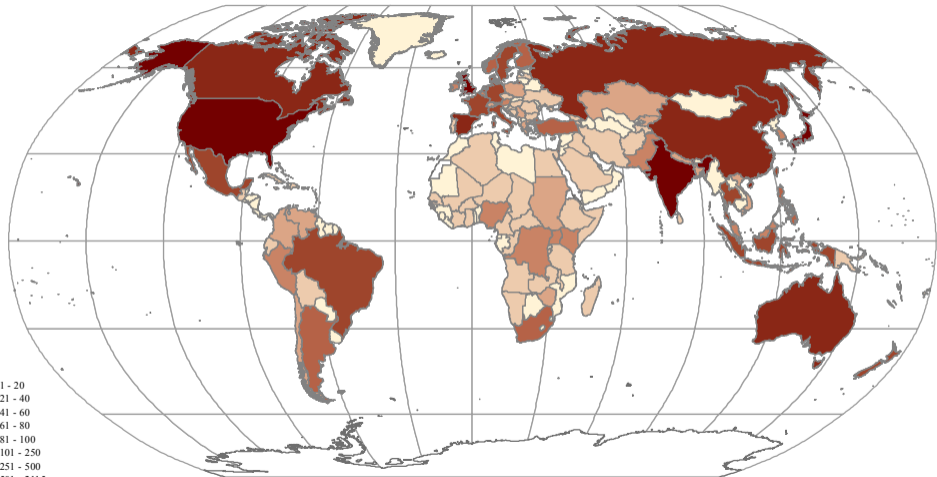

- 1 - 20
- 21 - 40
- 41 - 60
- 61 - 80
- 81 - 100
- 101 - 250
- 251 - 500
- 501 - 2115
- No Data

Supplement: rsif20140950supp5.pdf [file rsif20140950supp5.pdf]
